# Supplementary material for: Silencing the Mitochondrial Gatekeeper VDAC1 as a Potential Treatment for Bladder Cancer
Source: MDPI journal article supplement (doi:10.3390/cells13070627), 2024-04-04
Supplement: s1 [file s1]

## Supplementary Materials

**Table S1. Antibodies used in this study**

Antibodies against the indicated protein, their catalogue number, source, and the dilutions used in immunohistochemistry (IHC), immunoblot (WB), and immunofluorescence (IF) staining are presented.

| Antibody                                     | Source and Cat. No.                    | Dilution |         |        |
|----------------------------------------------|----------------------------------------|----------|---------|--------|
|                                              |                                        | IHC      | WB      | IF     |
| Rabbit monoclonal anti-VDAC1                 | Abcam, Cambridge, UK, ab15895          | 1:400    | 1:5000  | 1:1000 |
| Mouse monoclonal anti-VDAC1                  | Abcam, Cambridge, UK Ab186321          | 1:500    | 1:5000  | 1:1000 |
| Rabbit monoclonal anti-KI-67                 | Abcam, Cambridge, UK ab16667           | 1:100    |         | 1:100  |
| Mouse monoclonal anti- $\beta$ -actin        | Millipore, Billerica, MA, MAB1501      |          | 1:20000 |        |
| Rabbit polyclonal anti-citrate synthase (CS) | Abcam, Cambridge, UK ab96600           |          | 1:5000  | 1:250  |
| Rabbit monoclonal anti-Cyclin D1             | Abcam, Cambridge, UK, ab134175         |          | 1:5000  |        |
| Rabbit polyclonal anti-COX IV                | Abcam, Cambridge, UK ab16056           |          |         | 1:500  |
| Rabbit monoclonal anti-GLUT1                 | Abcam, Cambridge, UK, ab115730         |          |         | 1:200  |
| Mouse monoclonal anti-GAPDH                  | Abcam, Cambridge, UK, ab9484           |          |         | 1:200  |
| Rabbit polyclonal anti-CD31                  | Abcam, Cambridge, UK, ab28364          |          | 1:2000  |        |
| Rabbit polyclonal anti-CD-68                 | Abcam, Cambridge, UK, ab125212         |          |         | 1:2000 |
| Rabbit polyclonal anti-VEGF-B                | Santa Cruz, TX, USA, sc-80442          |          |         | 1:200  |
| Mouse monoclonal anti-ATP5a                  | Abcam, Cambridge, UK, ab14748          |          | 1:1000  | 1:300  |
| Rabbit monoclonal anti-HK-I                  | Abcam, Cambridge, UK, ab150423         |          |         | 1:200  |
| Rabbit monoclonal anti-LDH                   | Abcam, Cambridge, UK, ab52488          |          |         | 1:400  |
| Mouse monoclonal anti-Vimentin               | Abcam, Cambridge, UK, Ab8978           |          |         | 1:200  |
| Rabbit monoclonal anti-E-Cadherin            | Cell signaling, Danvers, MS, USA 3195S |          |         | 1:200  |
| Mouse monoclonal anti-N-Cadherin             | Santa Cruz, TX, USA, sc-393933         |          |         | 1:200  |
| Rabbit monoclonal anti-Cytokeratin14         | Abcam, Cambridge, UK Ab181595          | 1:500    |         |        |
| Rabbit monoclonal anti-ALDH1A1               | Abcam, Cambridge, UK Ab52492           | 1:150    | 1:2000  |        |
| Rabbit polyclonal anti- $\alpha$ -SMA        | Abcam, Cambridge, UK Ab5694            |          | 1:2000  | 1:200  |
| Rabbit monoclonal anti-CD44                  | Abcam, Cambridge, UK, ab243894         |          |         | 1:300  |
| Rabbit polyclonal Anti-SOX2                  | Abcam, Cambridge, UK, ab97959          |          |         | 1:500  |
| Anti-mouse IgG, Alexa Fluor 488              | Abcam, Cambridge, UK, ab150113         |          |         | 1:1000 |
| Anti-rabbit IgG, Alexa Fluor 555             | Abcam, Cambridge, UK, ab150078         |          |         | 1:1000 |
| Donkey anti-mouse HRP                        | Abcam, Cambridge, UK, ab98799          |          | 1:10000 |        |
| Goat anti-rabbit HRP                         | Promega, Wisconsin, W4018              |          | 1:10000 |        |

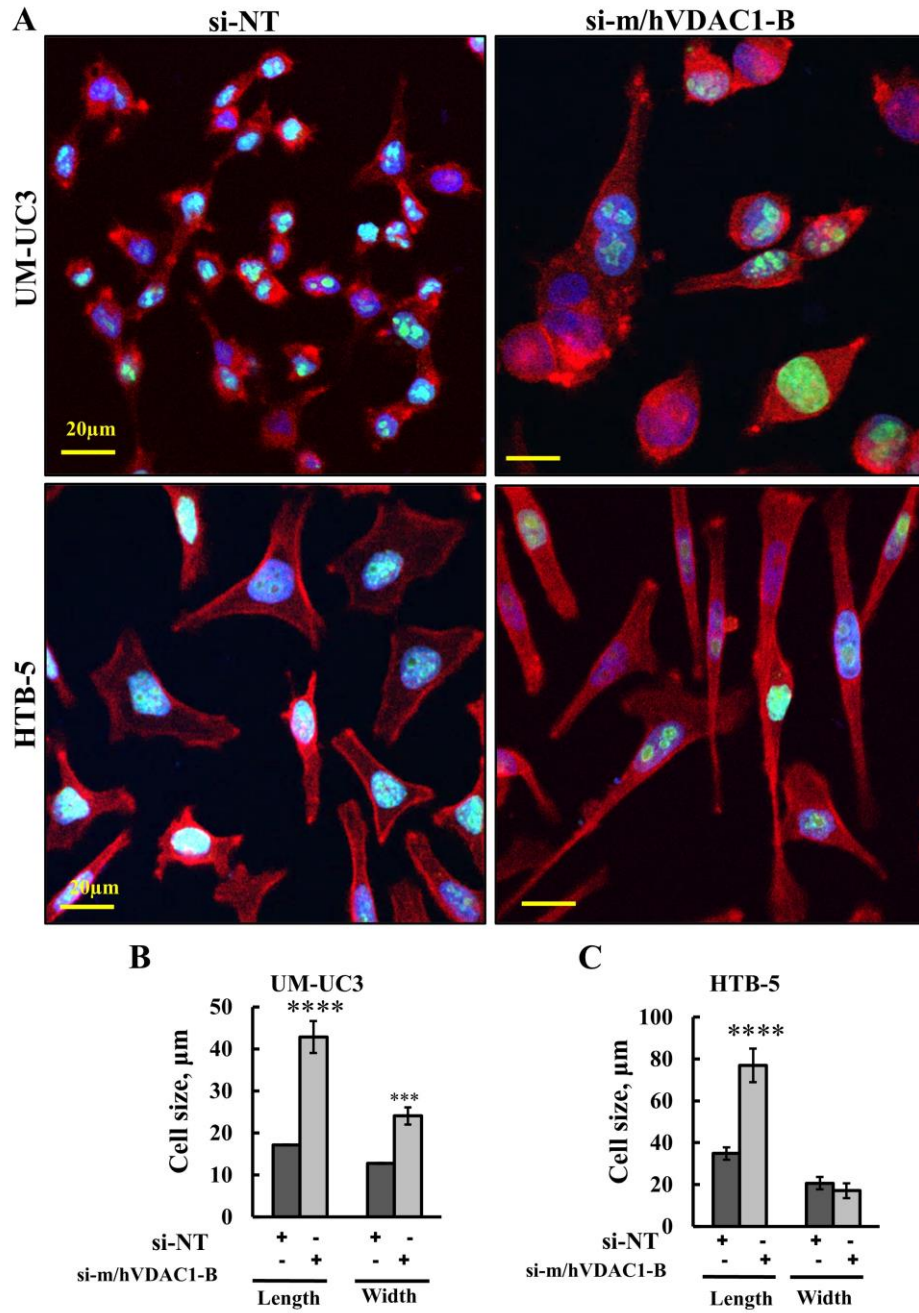

**Figure S1. Silencing VDAC1 expression impact cell morphology.**

Cells were treated with 50nM si-m/h-VDAC1 or si-NT, and 72h post-transfection were stained for F-actin using phalloidin or for Ki-67 using specific antibodies and visualized using a confocal microscope (**A**). Cell size, length and width were measured (n=30) and presented for both UN-UC3 and HTB-5 cell lines treated with si-NT or with si-m/h-VDAC1-B (**B,C**). Results are the means  $\pm$  SEM, \*\*\* $p < 0.001$ , \*\*\*\* $p < 0.0001$ .

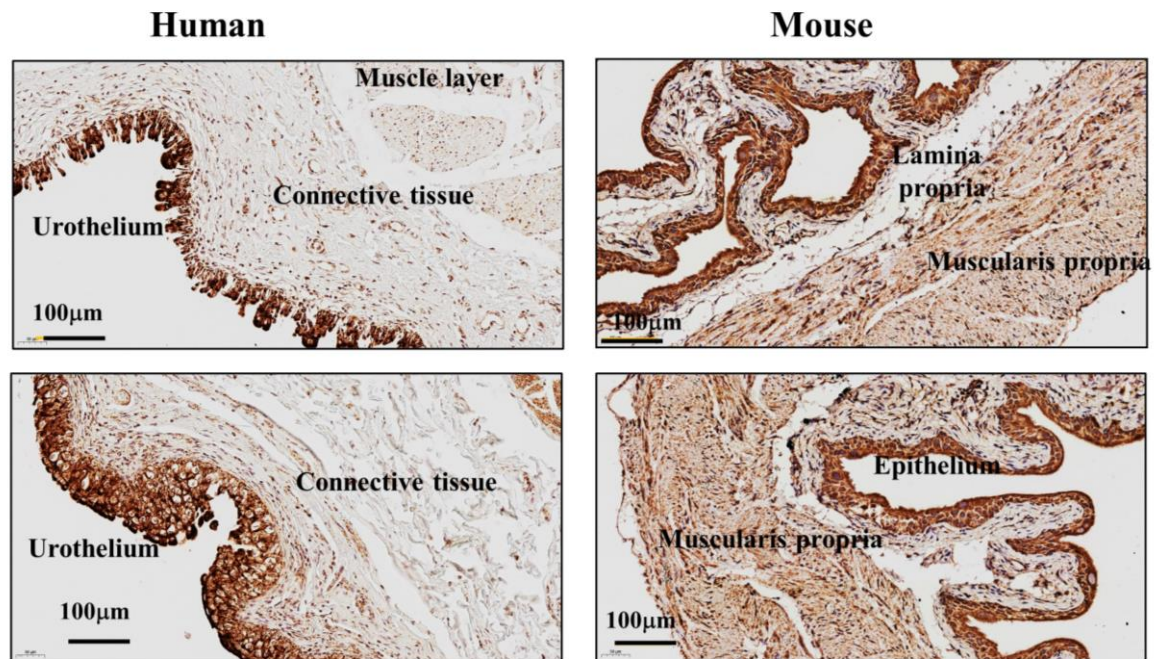

**Figure S2. VDAC1 in healthy human and mouse bladder epithelium.**

IHC staining of VDAC1 in sections of bladder from two healthy humans or mice, showing its high expression in the epithelium of these sections.
